# Supplementary material for: Bony cranial ornamentation linked to rapid evolution of gigantic theropod dinosaurs
Source: PubMed Central journal article supplement (PMC5052652; doi:10.1038/ncomms12931), 2016-09-27
Supplement: ncomms12931-s1.pdf [file ncomms12931-s1.pdf]

## Supplementary Figures

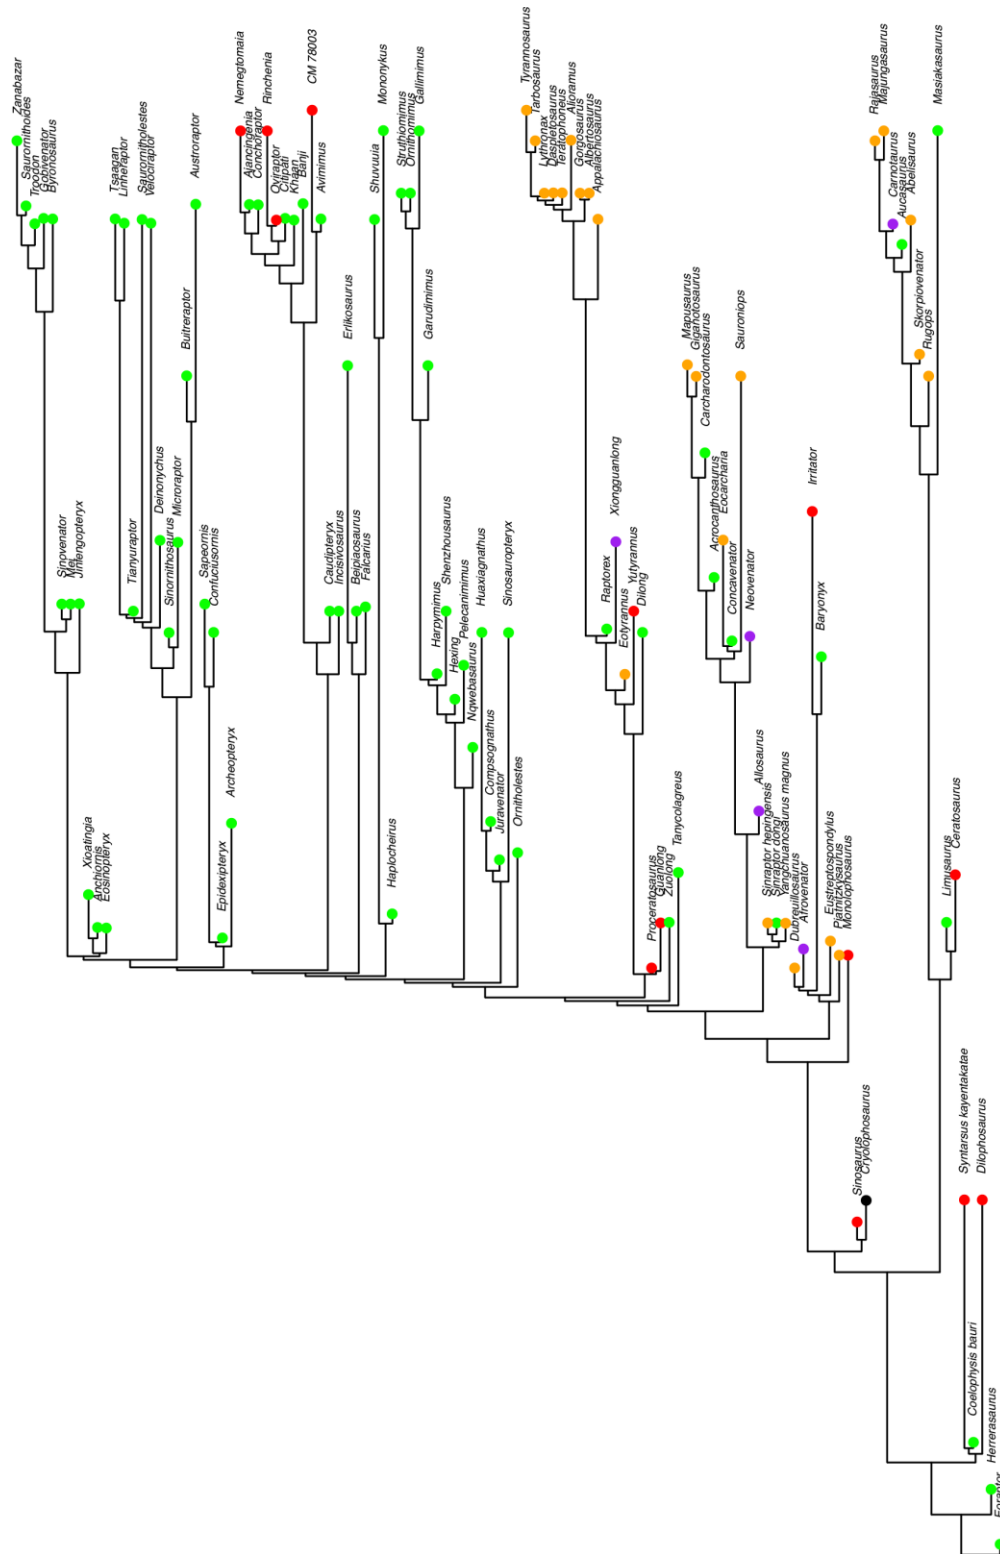

Supplementary Figure 1. Time calibrated phylogeny of 111 theropods used in this study. Colors represent cranial ornamentation: green, absent; red, parasagittal crests; black, forehead crest; purple, brow horns; orange, bumps and rugosities.

## Supplementary Tables

Supplementary Table 1. Summary of threshBayes results

|                     | <b>Gen</b> | <b>Sig 1</b> | <b>Sig 2</b> | <b>a1</b> | <b>a2</b> | <b>r</b> | <b>Logl</b> |
|---------------------|------------|--------------|--------------|-----------|-----------|----------|-------------|
| Min                 | 0          | 1            | 0.142        | -12.438   | 0.779     | -0.065   | -543.3      |
| 1 <sup>st</sup> Qu. | 255000     | 1            | 0.214        | -6.795    | 1.925     | 0.571    | -509.8      |
| Median              | 510000     | 1            | 0.243        | -5.367    | 2.292     | 0.650    | -502.2      |
| Mean                | 510000     | 1            | 0.247        | -5.359    | 2.291     | 0.631    | -502.8      |
| 3 <sup>rd</sup> Qu. | 765000     | 1            | 0.272        | -3.875    | 2.661     | 0.711    | -495.5      |
| Max                 | 1020000    | 1            | 0.473        | 1.966     | 4.201     | 0.871    | -465.4      |

Gen, number of generation; 1<sup>st</sup> Qu, first quarter of the analysis; 3<sup>rd</sup> Qu, third quarter of the analysis.

Supplementary Table 2. fitDiscrete results of ornamentation evolutionary rates tests

|        | <b>Equal Rates</b> | <b>Symmetrical</b> | <b>All Rates Different</b> |
|--------|--------------------|--------------------|----------------------------|
| q12    | 0.016              | 0.016              | 0.016                      |
| q21    | 0.016              | 0.016              | 0.026                      |
| Lnl    | -54.09             | -54.09             | -53.515                    |
| k      | 1                  | 1                  | 2                          |
| AIC    | 110.18             | 110.18             | 110.03                     |
| AICc   | 110.216            | 110.216            | 111.141                    |
| Weight | 0.38               | 0.38               | 0.24                       |
| RW     | 1.59               | 1.59               |                            |

q represents the rate of transitioning from one state (1 or 2) to the other. Lnl is the log likelihood of the model. k is the number of parameters in the model estimation; and AIC and AICc represent the Akaike Information Criterion and the sample size corrected AIC score. Rw is the AICc relative weight of the best fitting model compared to the second best model

Supplementary Table 3. Model estimates of AICc selected Generalized Hansen Models from OUwie with root not estimated.

| Tree | Model        | Log Lik  | AICc           | Theta Root   | Theta0       | Theta0 s.e.  | Theta1       | Theta1 s.e.  | $\alpha 0$   | $\alpha 0$ s.e. | $\alpha 1$  | $\alpha 1$ s.e. | $\sigma^2 0$ | $\sigma^2 0$ s.e. | $\sigma^2 1$ | $\sigma^2 1$ s.e. | Akaike Weights |
|------|--------------|----------|----------------|--------------|--------------|--------------|--------------|--------------|--------------|-----------------|-------------|-----------------|--------------|-------------------|--------------|-------------------|----------------|
| 1    | OUMV         | -88.959  | 191.564        | 3.292        | 2.06         | 1.863        | 7.058        | 0.144        | 0.158        | 0.035           | 0.158       | 0.035           | 1.776        | 0.719             | 0.15         | 0.046             | 0.98803        |
| 2    | OUMV         | -98.095  | 209.837        | 3.441        | 2.458        | 1.174        | 7.137        | 0.311        | 0.088        | 0.051           | 0.088       | 0.051           | 0.856        | 0.447             | 0.162        | 0.09              | 0.48532        |
| 3    | OUMV         | -102.124 | 217.896        | 3.327        | 2.279        | 0.923        | 7.303        | 0.912        | 0.037        | 0.017           | 0.037       | 0.017           | 0.603        | 0.26              | 0.137        | 0.047             | 0.50093        |
| 4    | OUMA         | -99.652  | 212.951        | 4.589        | 2.061        | 0.871        | 8.029        | 0.29         | 0.062        | 0.02            | 0.053       | 0.019           | 0.495        | 0.154             | 0.495        | 0.154             | 0.48142        |
| 5    | OUMV         | -98.149  | 209.944        | 1.427        | 2.874        | 2.695        | 7.085        | 0.199        | 0.213        | 0.06            | 0.213       | 0.06            | 3.275        | 1.482             | 0.233        | 0.085             | 0.99557        |
| 6    | OUMV         | -99.365  | 212.377        | 2.426        | 2.685        | 1.148        | 7.5          | 0.474        | 0.079        | 0.031           | 0.079       | 0.031           | 0.894        | 0.378             | 0.168        | 0.068             | 0.65747        |
| 7    | OUMVA        | -90.842  | 197.924        | 2.896        | 2.498        | 1.373        | 7.208        | 0.428        | 0.072        | 0.022           | 0.083       | 0.021           | 1.237        | 0.53              | 0.019        | 0.016             | 0.84298        |
| 8    | OUMV         | -89.781  | 193.208        | 0.001        | 3.598        | 1.368        | 7.43         | 0.179        | 0.103        | 0.027           | 0.103       | 0.027           | 1.09         | 0.422             | 0.109        | 0.039             | 0.99191        |
| 9    | OUMV         | -101.995 | 217.637        | 3.555        | 2.337        | 1.343        | 7.12         | 0.494        | 0.127        | 0.093           | 0.127       | 0.093           | 1.032        | 0.837             | 0.302        | 0.163             | 0.41575        |
| 10   | OUMV         | -94.369  | 202.385        | 2.637        | 2.503        | 1.288        | 6.938        | 0.38         | 0.114        | 0.051           | 0.114       | 0.051           | 0.974        | 0.48              | 0.199        | 0.087             | 0.69203        |
| 11   | OUMV         | -99.252  | 212.151        | 2.732        | 2.369        | 2.306        | 7.069        | 0.243        | 0.21         | 0.059           | 0.21        | 0.059           | 2.41         | 1.023             | 0.356        | 0.128             | 0.96487        |
| 12   | OUMV         | -102.448 | 218.543        | 3.807        | 1.861        | 2.061        | 6.92         | 0.306        | 0.194        | 0.07            | 0.194       | 0.07            | 2.016        | 0.906             | 0.408        | 0.167             | 0.61504        |
| 13   | OUMV         | -96.687  | 207.022        | 2.907        | 2.617        | 1.201        | 7.39         | 0.229        | 0.1          | 0.044           | 0.1         | 0.044           | 0.856        | 0.37              | 0.178        | 0.088             | 0.74887        |
| 14   | OUMV         | -93.113  | 199.873        | 2.784        | 2.52         | 1.875        | 7.695        | 0.17         | 0.166        | 0.033           | 0.166       | 0.033           | 1.782        | 0.659             | 0.173        | 0.057             | 0.78463        |
| 15   | OUMV         | -97.145  | 207.938        | 2.582        | 2.436        | 1.947        | 6.993        | 0.294        | 0.174        | 0.081           | 0.174       | 0.081           | 1.959        | 1.12              | 0.256        | 0.129             | 0.99668        |
| 16   | OUMV         | -96.281  | 206.209        | 1.355        | 3.085        | 1.308        | 7.296        | 0.437        | 0.103        | 0.03            | 0.103       | 0.03            | 1.011        | 0.433             | 0.201        | 0.066             | 0.89985        |
| 17   | OUMV         | -95.026  | 203.698        | 2.888        | 2.558        | 1.04         | 7.033        | 0.456        | 0.075        | 0.035           | 0.075       | 0.035           | 0.691        | 0.297             | 0.15         | 0.07              | 0.88417        |
| 18   | OUMVA        | -94.451  | 205.143        | 0.322        | 2.775        | 1.368        | 7.264        | 0.442        | 0.067        | 0.027           | 0.075       | 0.028           | 1.265        | 0.701             | 0.054        | 0.028             | 0.64390        |
| 19   | OUMV         | -100.933 | 215.513        | 3.148        | 2.37         | 2.189        | 6.708        | 0.323        | 0.182        | 0.066           | 0.182       | 0.066           | 2.294        | 1.214             | 0.372        | 0.152             | 0.61760        |
| 20   | OUMV         | -90.023  | 193.693        | 2.02         | 2.834        | 1.701        | 7.251        | 0.085        | 0.131        | 0.032           | 0.131       | 0.032           | 1.612        | 0.613             | 0.111        | 0.037             | 0.59402        |
| 21   | OUMV         | -98.812  | 211.271        | 2.823        | 2.517        | 1.113        | 6.884        | 0.164        | 0.064        | 0.025           | 0.064       | 0.025           | 0.783        | 0.322             | 0.113        | 0.043             | 0.67928        |
| 22   | OUMV         | -91.985  | 197.617        | 3.269        | 2.426        | 1.8          | 6.942        | NaN          | 0.133        | 0.028           | 0.133       | 0.028           | 1.722        | 0.669             | 0.114        | 0.039             | 0.72951        |
| 23   | OUMA         | -97.272  | 208.191        | 3.736        | 1.943        | 1.234        | 7.648        | 0.236        | 0.143        | 0.032           | 0.135       | 0.032           | 0.795        | 0.216             | 0.795        | 0.216             | 0.97206        |
| 24   | OUMV         | -94.675  | 202.997        | 2.976        | 2.442        | 0.797        | 7.846        | 0.743        | 0.053        | 0.016           | 0.053       | 0.016           | 0.457        | 0.14              | 0.142        | 0.047             | 0.73617        |
| 25   | OUMV         | -97.882  | 209.412        | 2.922        | 2.609        | 1.28         | 7.228        | 0.404        | 0.111        | 0.062           | 0.111       | 0.062           | 0.964        | 0.584             | 0.245        | 0.114             | 0.67068        |
|      | <b>Means</b> |          | <b>209.376</b> | <b>3.025</b> | <b>2.394</b> | <b>1.538</b> | <b>7.241</b> | <b>0.334</b> | <b>0.131</b> | <b>0.049</b>    | <b>0.13</b> | <b>0.049</b>    | <b>1.358</b> | <b>0.642</b>      | <b>0.313</b> | <b>0.117</b>      |                |

Each parameter, Theta,  $\alpha$ , and  $\sigma^2$ , are categorized by non-ornamented (0) and ornamented (1) regimes. Means are model averaged from Akaike Weights.

Supplementary Table 4. Model estimates of AICc selected Generalized Hansen Models from OUwie with root estimated.

| Tree | Model        | Log Lik  | AICc           | Theta0       | Theta0 s.e.  | Theta1       | Theta1 s.e.  | $\alpha_0$   | $\alpha_0$ s.e. | $\alpha_1$   | $\alpha_1$ s.e. | $\sigma^2_0$ | $\sigma^2_0$ s.e. | $\sigma^2_1$ | $\sigma^2_1$ s.e. | Akaike Weights |
|------|--------------|----------|----------------|--------------|--------------|--------------|--------------|--------------|-----------------|--------------|-----------------|--------------|-------------------|--------------|-------------------|----------------|
| 1    | OUMV         | -89.22   | 189.593        | 2.826        | 0.899        | 7.081        | 0.155        | 0.159        | 0.033           | 0.159        | 0.033           | 1.906        | 0.767             | 0.144        | 0.043             | 0.77767        |
| 2    | OUMV         | -98.707  | 208.568        | 2.867        | 0.856        | 7.127        | 0.328        | 0.091        | 0.038           | 0.091        | 0.038           | 0.973        | 0.422             | 0.155        | 0.069             | 0.70501        |
| 3    | OUMV         | -102.96  | 217.073        | 2.313        | 0.975        | 6.727        | 0.653        | 0.058        | 0.069           | 0.058        | 0.069           | 0.972        | 1.019             | 0.144        | 0.074             | 0.67629        |
| 4    | OUMV         | -100.345 | 211.844        | 2.651        | 0.911        | 7.258        | 0.355        | 0.071        | 0.026           | 0.071        | 0.026           | 0.907        | 0.415             | 0.112        | 0.042             | 0.40957        |
| 5    | OUMV         | -97.41   | 205.974        | 1.331        | 0.993        | 7.123        | 0.193        | 0.18         | 0.06            | 0.18         | 0.06            | 2.892        | 1.37              | 0.177        | 0.072             | 0.99940        |
| 6    | OUMV         | -99.073  | 209.3          | 2.492        | 0.919        | 7.412        | 0.427        | 0.087        | 0.027           | 0.087        | 0.027           | 1.048        | 0.422             | 0.159        | 0.054             | 0.72593        |
| 7    | OUMV         | -94.41   | 199.974        | 2.766        | 0.852        | 7.411        | 0.325        | 0.111        | 0.039           | 0.111        | 0.039           | 1.104        | 0.526             | 0.152        | 0.054             | 0.99893        |
| 8    | OUMV         | -89.446  | 190.045        | 1.974        | 0.891        | 7.302        | 0.218        | 0.112        | 0.025           | 0.112        | 0.025           | 1.18         | 0.433             | 0.114        | 0.037             | 0.99997        |
| 9    | OUMV         | -102.953 | 217.06         | 2.604        | 0.801        | 7.351        | 0.746        | 0.067        | 0.045           | 0.067        | 0.045           | 0.703        | 0.388             | 0.176        | 0.086             | 0.67274        |
| 10   | OUMV         | -94.444  | 200.042        | 2.51         | 0.796        | 6.949        | 0.384        | 0.103        | 0.037           | 0.103        | 0.037           | 0.974        | 0.426             | 0.174        | 0.063             | 0.66349        |
| 11   | OUMV         | -99.088  | 209.331        | 2.117        | 0.85         | 7.056        | 0.259        | 0.168        | 0.065           | 0.168        | 0.065           | 2.058        | 0.987             | 0.267        | 0.122             | 0.98990        |
| 12   | OUMV         | -103.287 | 217.728        | 3.109        | 0.859        | 6.922        | 0.346        | 0.155        | 0.085           | 0.155        | 0.085           | 1.855        | 0.954             | 0.315        | 0.191             | 0.69572        |
| 13   | OUMV         | -96.893  | 204.941        | 2.722        | 0.806        | 7.383        | 0.31         | 0.099        | 0.032           | 0.099        | 0.032           | 0.88         | 0.339             | 0.172        | 0.065             | 0.73303        |
| 14   | OUMV         | -93.182  | 197.519        | 2.617        | 0.832        | 7.734        | 0.176        | 0.163        | 0.031           | 0.163        | 0.031           | 1.87         | 0.684             | 0.159        | 0.049             | 0.74596        |
| 15   | OUMV         | -97.013  | 205.18         | 2.357        | 0.94         | 6.986        | 0.339        | 0.141        | 0.067           | 0.141        | 0.067           | 1.735        | 0.958             | 0.191        | 0.094             | 0.91977        |
| 16   | OUMV         | -95.285  | 201.723        | 2.287        | 0.876        | 7.356        | 0.413        | 0.101        | 0.027           | 0.101        | 0.027           | 1.026        | 0.428             | 0.18         | 0.055             | 0.75431        |
| 17   | OUMV         | -95.525  | 202.203        | 2.69         | 0.817        | 6.914        | 0.408        | 0.083        | 0.029           | 0.083        | 0.029           | 0.811        | 0.324             | 0.151        | 0.061             | 0.97920        |
| 18   | OUMV         | -96.548  | 204.25         | 2.098        | 0.812        | 7.472        | 0.38         | 0.11         | 0.054           | 0.11         | 0.054           | 1.015        | 0.538             | 0.18         | 0.094             | 0.99190        |
| 19   | OUMV         | -101.095 | 213.343        | 2.868        | 0.98         | 6.686        | 0.323        | 0.169        | 0.066           | 0.169        | 0.066           | 2.323        | 1.244             | 0.33         | 0.14              | 0.54485        |
| 20   | OUMV         | -89.866  | 190.886        | 2.255        | 0.922        | 7.234        | 0.125        | 0.132        | 0.03            | 0.132        | 0.03            | 1.668        | 0.616             | 0.107        | 0.034             | 0.63948        |
| 21   | OUMV         | -98.902  | 208.958        | 2.58         | 0.937        | 6.759        | 0.357        | 0.072        | 0.025           | 0.072        | 0.025           | 0.941        | 0.384             | 0.108        | 0.04              | 0.71095        |
| 22   | OUMV         | -92.011  | 195.176        | 2.865        | 1.038        | 6.961        | 0.152        | 0.131        | 0.03            | 0.131        | 0.03            | 1.72         | 0.69              | 0.112        | 0.038             | 0.73712        |
| 23   | OUMA         | -100.18  | 211.513        | 2.761        | 0.704        | 8.067        | 0.333        | 0.104        | 0.029           | 0.096        | 0.028           | 0.659        | 0.186             | 0.659        | 0.186             | 0.62368        |
| 24   | OUMV         | -95.664  | 202.481        | 2.316        | 0.676        | 7.548        | 0.798        | 0.047        | 0.022           | 0.047        | 0.022           | 0.434        | 0.174             | 0.14         | 0.048             | 0.61723        |
| 25   | OUMV         | -97.823  | 206.799        | 2.588        | 0.824        | 7.298        | 0.409        | 0.096        | 0.053           | 0.096        | 0.053           | 0.919        | 0.531             | 0.204        | 0.092             | 0.74029        |
|      | <b>Means</b> |          | <b>204.323</b> | <b>2.467</b> | <b>0.872</b> | <b>7.204</b> | <b>0.348</b> | <b>0.115</b> | <b>0.042</b>    | <b>0.115</b> | <b>0.042</b>    | <b>1.334</b> | <b>0.622</b>      | <b>0.188</b> | <b>0.075</b>      |                |

Each parameter, Theta,  $\alpha$ , and  $\sigma^2$ , are categorized by non-ornamented (0) and ornamented (1) regimes. Means are model averaged from Akaike Weights.

Supplementary Table 5. Table of primary data used in this study

| Taxon                                   | Femoral Length (mm) or Alternative Measure                                                                                                     | Body Mass (kg) | Cranial Ornament | Time Interval |
|-----------------------------------------|------------------------------------------------------------------------------------------------------------------------------------------------|----------------|------------------|---------------|
| <i>Abelisaurus comahuensis</i>          | Skull length from Sampson and Witmer <sup>1</sup> fig. 2, extrapolated body mass based on <i>Carnotaurus</i> skull length, 596 mm <sup>2</sup> | 3540           | 1                | 35            |
| <i>Acrocanthosaurus atokensis</i>       | 1180                                                                                                                                           | 5250           | 0                | 1             |
| <i>Afrovenator abakensis</i>            | 761                                                                                                                                            | 986            | 0                | 2             |
| <i>Ajancingenia yanshini</i>            | 240                                                                                                                                            | 24             | 0                | 36            |
| <i>Albertosaurus sarcophagus</i>        | 1020                                                                                                                                           | 2934           | 1                | 27            |
| <i>Alioramus remotus</i>                | 560                                                                                                                                            | 369            | 1                | 23            |
| <i>Allosaurus fragilis</i>              | 1001                                                                                                                                           | 2396           | 1                | 3             |
| <i>Anchiornis huxleyi</i>               | 43.2                                                                                                                                           | 0.096          | 0                | 46            |
| <i>Anzu wyliei</i>                      | 495                                                                                                                                            | 247.8          | 1                | 28            |
| <i>Appalachiosaurus montgomeriensis</i> | 786                                                                                                                                            | 1099.1         | 1                | 35            |
| <i>Archeopteryx lithographica</i>       | 61                                                                                                                                             | 0.291          | 0                | 40            |
| <i>Aucasaurus garridoi</i>              | 725 from <sup>2</sup>                                                                                                                          | 847            | 1                | 52            |
| <i>Austroraptor cabazai</i>             | 560 <sup>3</sup>                                                                                                                               | 369            | 0                | 36            |
| <i>Avimimus portentosus</i>             | 188                                                                                                                                            | 10.9           | 0                | 35            |
| <i>Banji long</i>                       | 123                                                                                                                                            | 2.8            | 0                | 36            |
| <i>Baryonyx walkeri</i>                 | Body mass taken from <sup>4</sup>                                                                                                              | 1981           | 1                | 54            |
| <i>Beipiaosaurus inexpectus</i>         | 250                                                                                                                                            | 27             | 0                | 31            |
| <i>Buitreraptor gonzalezorum</i>        | 145                                                                                                                                            | 4.741          | 0                | 19            |
| <i>Byronosaurus jaffei</i>              | Makovicky et al., <sup>5</sup> dentary 85.7 mm, Body mass extrapolated from <i>Zanabazar</i> <sup>6</sup> dentary 117 mm                       | 3.102          | 0                | 35            |
| <i>Carcharodontosaurus saharicus</i>    | 1260                                                                                                                                           | 5028           | 0                | 18            |
| <i>Carnotaurus sastrei</i>              | 1018                                                                                                                                           | 2529.1         | 1                | 10            |
| <i>Caudipteryx zoui</i>                 | 149                                                                                                                                            | 5.2            | 0                | 31            |
| <i>Ceratosaurus nasicornis</i>          | 759                                                                                                                                            | 982            | 1                | 8             |
| <i>Citipati osmolskae</i>               | 397                                                                                                                                            | 121.7          | 0                | 35            |
| <i>Coelophysis bauri</i>                | 245                                                                                                                                            | 26             | 0                | 7             |

|                                        |                                                                                                                                    |         |   |    |
|----------------------------------------|------------------------------------------------------------------------------------------------------------------------------------|---------|---|----|
| <i>Compsognathus longipes</i>          | 109.7                                                                                                                              | 0.5     | 0 | 21 |
| <i>Concavenator corcovatus</i>         | 560                                                                                                                                | 368.7   | 0 | 45 |
| <i>Conchoraptor gracilis</i>           | 183                                                                                                                                | 10      | 0 | 36 |
| <i>Confuciusornis sanctus</i>          | 42                                                                                                                                 | 0.088   | 0 | 24 |
| <i>Cryolophosaurus ellioti</i>         | 769                                                                                                                                | 1024    | 1 | 11 |
| <i>Daspletosaurus torosus</i>          | 1020                                                                                                                               | 2388    | 1 | 27 |
| <i>Deinonychus antirrhopus</i>         | 440                                                                                                                                | 169.514 | 0 | 14 |
| <i>Dilong paradoxus</i>                | 181                                                                                                                                | 10      | 0 | 24 |
| <i>Dilophosaurus wetherilli</i>        | 552                                                                                                                                | 362     | 1 | 6  |
| <i>Dubreuillosaurus valesdunensis</i>  | 450                                                                                                                                | 182     | 0 | 15 |
| <i>Eocarcharia dinops</i>              | Sereno and Brusatte <sup>7</sup> , frontal 102 mm, Body mass extrapolated from <i>Acrocanthosaurus</i> frontal 191 mm <sup>8</sup> | 2804    | 1 | 14 |
| <i>Eoraptor lunensis</i>               | 154                                                                                                                                | 5.757   | 0 | 4  |
| <i>Eosinopteryx brevipenna</i>         | 48.5                                                                                                                               | 0.186   | 0 | 46 |
| <i>Eotyrannus lengi</i>                | Estimated tibia length 535 mm                                                                                                      | 250     | 0 | 25 |
| <i>Epidexipteryx hui</i>               | 51                                                                                                                                 | 0.164   | 0 | 38 |
| <i>Erlikosaurus andrewsi</i>           | 513                                                                                                                                | 278     | 0 | 20 |
| <i>Eustreptospondylus oxoniensis</i>   | 510                                                                                                                                | 253     | 0 | 13 |
| <i>Falcarius utahensis</i>             | 403                                                                                                                                | 128     | 0 | 34 |
| <i>Gallimimus bullatus</i>             | 673                                                                                                                                | 667     | 0 | 9  |
| <i>Garudimimus brevipes</i>            | 371                                                                                                                                | 98      | 0 | 20 |
| <i>Giganotosaurus carolinii</i>        | 1350                                                                                                                               | 6280    | 1 | 19 |
| <i>Gobivenator mongoliensis</i>        | 192 <sup>9</sup>                                                                                                                   | 11.7    | 0 | 35 |
| <i>Gorgosaurus libratus</i>            | 967                                                                                                                                | 2709    | 1 | 27 |
| <i>Guanlong wucaii</i>                 | 420                                                                                                                                | 163     | 1 | 16 |
| <i>Haplocheirus sollers</i>            | 214.32                                                                                                                             | 16.7    | 0 | 33 |
| <i>Harpymimus okladnikovi</i>          | 406                                                                                                                                | 131     | 0 | 30 |
| <i>Herrerasaurus ischigualastensis</i> | 482                                                                                                                                | 227.393 | 0 | 5  |
| <i>Hexing qingyi</i>                   | 135                                                                                                                                | 3.766   | 0 | 42 |
| <i>Huaxiagnathus orientalis</i>        | 170                                                                                                                                | 7.96    | 0 | 24 |
| <i>Incisivosaurus gauthieri</i>        | 174                                                                                                                                | 8.5     | 0 | 31 |
| <i>Irritator challengerii</i>          | Skull roof length <sup>10</sup> , body mass extrapolated from                                                                      | 1464    | 1 | 53 |

| <i>Baryonyx</i> <sup>11</sup>      |                                                                                                                                                                              |        |       |    |    |
|------------------------------------|------------------------------------------------------------------------------------------------------------------------------------------------------------------------------|--------|-------|----|----|
| <i>Jinfengopteryx elegans</i>      | 70                                                                                                                                                                           | 0.454  | 0     | 37 |    |
| <i>Juravenator starki</i>          | 53.03                                                                                                                                                                        | 0.186  | 0     | 44 |    |
| <i>Khaan mckennai</i>              | 194                                                                                                                                                                          | 12.1   | 0     | 35 |    |
| <i>Limusaurus inextricabilis</i>   | 208 <sup>12</sup>                                                                                                                                                            | 15.1   | 0     | 16 |    |
| <i>Linheraptor exquisitus</i>      | 230                                                                                                                                                                          | 20.96  | 0     | 10 |    |
| <i>Lythronax argestes</i>          | Loewen et al. <sup>13</sup> tibia length 810 mm, femur estimated 861.7 mm from <i>Daspletosaurus</i> MOR 590 as reported in Currie <sup>14</sup> , femur 865 mm, tibia 813.1 |        | 1478  | 1  | 27 |
| <i>Majungasaurus crenatissimus</i> | 568                                                                                                                                                                          | 386    | 1     | 9  |    |
| <i>Mapusaurus roseae</i>           | 1300                                                                                                                                                                         | 5561   | 1     | 20 |    |
| <i>Masiakasaurus knopfleri</i>     | 202.5                                                                                                                                                                        | 14     | 0     | 9  |    |
| <i>Mei long</i>                    | 81                                                                                                                                                                           | 0.726  | 0     | 37 |    |
| <i>Microraptor zhaoianus</i>       | 100                                                                                                                                                                          | 1.432  | 0     | 41 |    |
| <i>Monolophosaurus jiangi</i>      | From <sup>4</sup>                                                                                                                                                            | 391.05 | 1     | 12 |    |
| <i>Mononykus olecranus</i>         | 138.6                                                                                                                                                                        | 4.1    | 0     | 9  |    |
| <i>Nemegtomaia barsboldi</i>       | 360                                                                                                                                                                          | 88.8   | 1     | 9  |    |
| <i>Neovenator salerii</i>          | 780                                                                                                                                                                          | 866    | 0     | 17 |    |
| <i>Nqwebasaurus thwazi</i>         | 52                                                                                                                                                                           | 0.174  | 0     | 48 |    |
| <i>Ornitholestes hermanni</i>      | 220                                                                                                                                                                          | 18.167 | 0     | 22 |    |
| <i>Ornithomimus velox</i>          | 435                                                                                                                                                                          | 163    | 0     | 27 |    |
| <i>Oviraptor philoceratops</i>     | 303                                                                                                                                                                          | 51     | 1     | 35 |    |
| <i>Pelecanimimus polydon</i>       | 191                                                                                                                                                                          | 12     | 0     | 29 |    |
| <i>Piatnitzkysaurus floresi</i>    | 548                                                                                                                                                                          | 352    | 1     | 12 |    |
| <i>Proceratosaurus bradleyi</i>    | Rahut et al. <sup>15</sup> skull length 251.4 mm, Body mass extrapolated from <i>Guanlong</i> <sup>16</sup>                                                                  |        | 146.3 | 1  | 15 |
| <i>Rajasaurus narmadensis</i>      | Body mass extrapolate from distal femur breadth compared to <i>Carnotaurus</i> <sup>17</sup>                                                                                 |        | 1916  | 1  | 23 |
| <i>Raptorex kriegsteini</i>        | 338                                                                                                                                                                          | 72     | 0     | 26 |    |
| <i>Rinchenia mongoliensis</i>      | 339                                                                                                                                                                          | 73.2   | 1     | 9  |    |
| <i>Rugops primus</i>               | Sereno et al. <sup>18</sup> skull length 315 mm, Body mass extrapolated from <i>Carnotaurus</i> skull length 596 mm <sup>2</sup>                                             |        | 1336  | 1  | 19 |
| <i>Sapeornis chaoyangensis</i>     | 81                                                                                                                                                                           | 0.726  | 0     | 39 |    |

|                                     |                                                                                                                                         |        |   |    |
|-------------------------------------|-----------------------------------------------------------------------------------------------------------------------------------------|--------|---|----|
| <i>Sauroniops pachytholus</i>       | Cau et al. <sup>19</sup> , frontal 177.9 mm, Body mass extrapolated from <i>Acrocanthosaurus</i> frontal 191 mm <sup>8</sup>            | 4890   | 1 | 19 |
| <i>Saurornithoides mongoliensis</i> | 200                                                                                                                                     | 13.363 | 0 | 36 |
| <i>Saurornitholestes langstoni</i>  | 225                                                                                                                                     | 19.531 | 0 | 35 |
| <i>Shenzhousaurus orientalis</i>    | 191                                                                                                                                     | 12     | 0 | 31 |
| <i>Shuvuuia deserti</i>             | 108                                                                                                                                     | 1.8    | 0 | 35 |
| <i>Sinornithosaurus millenii</i>    | 148                                                                                                                                     | 5.065  | 0 | 24 |
| <i>Sinosauropteryx prima</i>        | 53                                                                                                                                      | 0.185  | 0 | 24 |
| <i>Sinosaurus triassicus</i>        | 587                                                                                                                                     | 429    | 1 | 55 |
| <i>Sinovenator changii</i>          | 118                                                                                                                                     | 2.441  | 0 | 37 |
| <i>Sinraptor dongi</i>              | 869.5                                                                                                                                   | 1559   | 1 | 16 |
| <i>Sinraptor hepingensis</i>        | 995                                                                                                                                     | 2237   | 1 | 16 |
| <i>Skorpiovenator bustingorryi</i>  | Juarez Valieri et al. <sup>2</sup> skull length 281 mm. Body mass extrapolated from <i>Carnotaurus</i> skull length 596 mm <sup>2</sup> | 1192   | 1 | 51 |
| <i>Struthiomimus altus</i>          | 512                                                                                                                                     | 276    | 0 | 27 |
| <i>Suchomimus tenerensis</i>        | 1080                                                                                                                                    | 3014   | 0 | 14 |
| <i>Syntarsus kyantakatae</i>        | 272                                                                                                                                     | 35.98  | 1 | 6  |
| <i>Tanycolagreus topwilsoni</i>     | 355                                                                                                                                     | 84.89  | 0 | 49 |
| <i>Tarbosaurus bataar</i>           | 1120                                                                                                                                    | 4297   | 1 | 23 |
| <i>Teratophoneus curriei</i>        | 757                                                                                                                                     | 974    | 1 | 27 |
| <i>Tianyuraptor ostromi</i>         | 207 <sup>20</sup>                                                                                                                       | 14.9   | 0 | 31 |
| <i>Troodon formosus</i>             | 300                                                                                                                                     | 49.35  | 0 | 10 |
| <i>Tsaagan mangas</i>               | Norell et al. <sup>21</sup> skull length 193.3 mm, Body mass extrapolated from <i>Linheraptor</i> <sup>22</sup> skull length 225 mm     | 18.01  | 0 | 35 |
| <i>Tyrannosaurus rex</i>            | 1350                                                                                                                                    | 6168   | 1 | 28 |
| <i>Velociraptor mongoliensis</i>    | 238                                                                                                                                     | 23.406 | 0 | 10 |
| <i>Xiaotingia zhengi</i>            | 84                                                                                                                                      | 0.812  | 0 | 47 |
| <i>Xiongguanlong baimoensis</i>     | 510                                                                                                                                     | 401    | 0 | 14 |
| <i>Yangchuanosaurus magnus</i>      | 1200                                                                                                                                    | 4297   | 1 | 16 |
| <i>Yutyrannus huali</i>             | 850 <sup>23</sup>                                                                                                                       | 1415   | 1 | 31 |
| <i>Zanabazar junior</i>             | 140                                                                                                                                     | 4.235  | 0 | 23 |
| <i>Zuolong salliei</i>              | 336                                                                                                                                     | 71.1   | 0 | 16 |



Supplementary Table 6. Time interval data used in paleotree time scaling

| Time Interval | Start Time (Ma) | End Time (Ma) |
|---------------|-----------------|---------------|
| 1             | 125             | 113           |
| 2             | 174.1           | 145           |
| 3             | 150             | 145           |
| 4             | 237             | 228           |
| 5             | 237             | 208.5         |
| 6             | 199.3           | 182.7         |
| 7             | 228             | 210.3         |
| 8             | 161.2           | 145           |
| 9             | 70.6            | 65.5          |
| 10            | 83.5            | 72.1          |
| 11            | 199.3           | 182.7         |
| 12            | 166.1           | 163.5         |
| 13            | 164.7           | 161.2         |
| 14            | 125             | 100.5         |
| 15            | 167.7           | 164.7         |
| 16            | 163.5           | 157.3         |
| 17            | 129.4           | 125           |
| 18            | 113             | 93.5          |
| 19            | 99.6            | 93.5          |
| 20            | 99.6            | 89.8          |
| 21            | 152             | 145           |
| 22            | 157.3           | 145           |
| 23            | 72.1            | 66            |
| 24            | 130             | 122.5         |
| 25            | 136.4           | 124.5         |
| 26            | 129.4           | 122.5         |
| 27            | 76.5            | 75.5          |
| 28            | 67              | 65.5          |
| 29            | 133             | 128           |
| 30            | 136             | 125           |
| 31            | 125             | 125           |
| 32            | 99.6            | 89.3          |
| 33            | 161.2           | 158.7         |
| 34            | 124.5           | 124.5         |
| 35            | 83.5            | 70.6          |
| 36            | 83.5            | 65.5          |
| 37            | 125             | 122.5         |
| 38            | 166.1           | 157.3         |
| 39            | 125             | 122.5         |
| 40            | 152.1           | 145           |
| 41            | 120             | 111           |
| 42            | 140.2           | 125.5         |
| 43            | 76.5            | 75.5          |
| 44            | 155.7           | 150.8         |

|    |       |       |
|----|-------|-------|
| 45 | 130   | 125.5 |
| 46 | 167.7 | 150.8 |
| 47 | 161.2 | 152   |
| 48 | 145   | 132.9 |
| 49 | 157.3 | 152.1 |
| 50 | 80.6  | 79.9  |

## Supplementary Discussion

**Alternative results interpretation.** The interpretation of the results supported in this study is that once a lineage gains cranial ornaments then body mass evolution changes trajectories from a more Brownian motion random walk model to that of Brownian motion with a trend. However, it is conceivable that one could interpret the presence of many ornamented species with large body masses in our original data set as that theropod lineages naturally evolve toward larger body sizes and ornamentation is inevitable when a lineage obtains large size. Testing these philosophical differences in a Bayesian framework is possible, yet requires analyses outside the scope of this paper.

**Biases of AIC-based OU model inference.** Information theoretic approaches to model selection within phylogenetic comparative studies are the most common method to assess results from a suite of analyses. However, critical review of methods such as Akaike Information Criterion (AIC) has revealed some biased tendencies in model selection behavior that has important implications for interpretation within an evolutionary context. Specifically, AIC and AICc were shown to choose overly complex models more often than simpler models, even when the correct model was the simpler version<sup>24,25</sup>. The models that we tested within our OU framework ranged from simple to complex, and as such they possibly suffer from the issues raised of overly complex models being chosen preferentially. Within the current framework of OUwie<sup>26</sup> there is no other option for model assessment; therefore, we provide the Akaike Weights for each model given a specific phylogenetic tree so that the relative confidence in each model can be assessed (Supplementary Tables 3 & 4) in addition to the full estimated model parameters for each evolutionary model available in OUwie recorded in the Supplementary Data 1. As can be seen in the results for models where the optima migrates away from an ancestral state (root.station not estimated, Supplementary Table 3), the OUMV model possesses the majority of weight in virtually all cases, whereas the similarly complex OUMA model yields little weight. Though this does not negate the concerns of prior studies on AICc selection bias, it provides some support that our results may reflect a real biological pattern and not simply model assessment bias.

## Supplementary Methods

**Phylogenetic Tree.** We grafted a phylogenetic tree based on topologies published on various clades including basal theropods and tetanurans<sup>12,19,27–30</sup>, tyrannosauroids<sup>13,23,31</sup>, ornithomimosaur<sup>32</sup>, and all other coelurosaurs<sup>3,9,33–35</sup>. The femoral/body mass regression of Christiansen and Farina<sup>36</sup> was used to estimate body mass. If femora were not present on a particular taxon their body mass was estimated by scaling another element present in the specimen with the same element and body mass of their closest taxon on the phylogeny. Time Interval

references the time intervals that are required to run the *paleotree* R package<sup>37</sup>. See Supplementary Table 6 for complete list of intervals.

*Sauroniops*<sup>19</sup> and *Eocarcharia*<sup>7</sup> each scaled a frontal (177.9 mm and 102 mm, respectively) to that of *Acrocanthosaurus* (NCSM 14345, 191 mm)<sup>8</sup>. We scaled the total skull length of *Proceratosaurus* (251.4 mm)<sup>15</sup> to that of *Guanlong* (280.1 mm)<sup>16</sup>. Likewise, the total skull length of *Tsaagan* (193.3 mm)<sup>21</sup> was scaled to the total skull length of *Linheraptor* (225 mm)<sup>22</sup>. *Byronosaurus*<sup>5</sup> was scaled using only the dentary (85.7 mm) compared to *Zanabazar* (117 mm)<sup>6</sup>. Finally, the body mass of *Lythronax* was extrapolated using comparative tibial lengths between this taxon (810 mm) with that of *Daspletosaurus* (MOR 590, 865 mm) as reported by Currie<sup>14</sup>.

### Supplementary References

1. Sampson, S. D. & Witmer, L. M. Craniofacial anatomy of *Majungasaurus crenatissimus* (Theropoda: Abelisauridae) from the Late Cretaceous of Madagascar. *J. Vertebr. Paleontol.* **27**, 32–104 (2007).
2. Juárez Valieri, R. D. & Porfiri, J. D. New information on *Ekrixinatosaurus novasi* Calvo et al 2004, a giant and massively-constructed Abelisauroid from the “Middle Cretaceous” of Patagonia. *Paleontol. Dinosaur. En América Lat.* 161–169 (2010).
3. Novas, F. E., Pol, D., Canale, J. I., Porfiri, J. D. & Calvo, J. O. A bizarre Cretaceous theropod dinosaur from Patagonia and the evolution of Gondwanan dromaeosaurids. *Proc. R. Soc. B Biol. Sci.* **276**, 1101–1107 (2009).
4. Therrien, F. & Henderson, D. M. My theropod is bigger than yours... or not: estimating body size from skull length in theropods. *J. Vertebr. Paleontol.* **27**, 108–115 (2007).
5. Makovicky, P. J., Norell, M. A., Clark, J. M. & Rowe, T. Osteology and relationships of *Byronosaurus jaffei* (Theropoda: Troodontidae). *Am. Mus. Novit.* 1–32 (2003).
6. Norell, M. A. *et al.* A review of the Mongolian Cretaceous dinosaur Saurornithoides (Troodontidae: Theropoda). *Am. Mus. Novit.* 1–63 (2009).
7. Brusatte, S. L. & Sereno, P. C. Basal abelisaurid and carcharodontosaurid theropods from the Lower Cretaceous Elrhaz Formation of Niger. *Acta Palaeontol. Pol.* **53**, 15–46 (2008).
8. Eddy, D. R. & Clarke, J. A. New information on the cranial anatomy of *Acrocanthosaurus atokensis* and its implications for the phylogeny of Allosauroidea (Dinosauria: Theropoda). *PLOS One* **6**, e17932 (2011).
9. Tsuihiji, T. *et al.* An exquisitely preserved troodontid theropod with new information on the palatal structure from the Upper Cretaceous of Mongolia. *Naturwissenschaften* 1–12 (2014).
10. Sues, H.-D., Frey, E., Martill, D. M. & Scott, D. M. *Irritator challengeri*, a spinosaurid (Dinosauria: Theropoda) from the Lower Cretaceous of Brazil. *J. Vertebr. Paleontol.* **22**, 535–547 (2002).
11. Charig, A. J. & Milner, A. C. *Baryonyx walkeri*, a fish-eating dinosaur from the Wealden of Surrey. *Bull.-Nat. Hist. Mus. Geol. Ser.* **53**, 11–70 (1997).
12. Xu, X. *et al.* A Jurassic ceratosaur from China helps clarify avian digital homologies. *Nature* **459**, 940–944 (2009).
13. Loewen, M. A., Irmis, R. B., Sertich, J. J., Currie, P. J. & Sampson, S. D. Tyrant dinosaur evolution tracks the rise and fall of Late Cretaceous oceans. *PloS One* **8**, e79420 (2013).
14. Currie, P. J. Possible evidence of gregarious behavior in tyrannosaurids. *Gaia* **15**, 271–277 (1998).

15. Rauhut, O. W., Milner, A. C. & Moore-Fay, S. Cranial osteology and phylogenetic position of the theropod dinosaur *Proceratosaurus bradleyi* (Woodward, 1910) from the Middle Jurassic of England. *Zool. J. Linn. Soc.* **158**, 155–195 (2010).
16. Xu, X. *et al.* A basal tyrannosauroid dinosaur from the Late Jurassic of China. *Nature* **439**, 715–718 (2006).
17. Wilson, J. A. *et al.* A new abelisaurid (*Dinosauria, Theropoda*) from the Lameta Formation (Cretaceous, Maastrichtian) of India. (Museum of Paleontology, the University of Michigan, 2003).
18. Sereno, P. C., Wilson, J. A. & Conrad, J. L. New dinosaurs link southern landmasses in the mid-Cretaceous. *Proc. R. Soc. Lond. Ser. B* **271**, 1325–1330 (2004).
19. Cau, A., Dalla Vecchia, F. M. & Fabbri, M. A thick-skulled theropod (*Dinosauria, Saurischia*) from the Upper Cretaceous of Morocco with implications for carcharodontosaurid cranial evolution. *Cretac. Res.* (2012).
20. Zheng, X., Xu, X., You, H., Zhao, Q. & Dong, Z. A short-armed dromaeosaurid from the Jehol Group of China with implications for early dromaeosaurid evolution. *Proc. R. Soc. B Biol. Sci.* **277**, 211–217 (2010).
21. Norell, M. A. *et al.* A new dromaeosaurid theropod from Ukhaa Tolgod (Omnogov, Mongolia). *Am. Mus. Novit.* **3545**, 51 (2006).
22. Xu, X. *et al.* A new dromaeosaurid (*Dinosauria: Theropoda*) from the Upper Cretaceous Wulansuhai Formation of Inner Mongolia, China. *Zootaxa* **2403**, 1–9 (2010).
23. Xu, X. *et al.* A gigantic feathered dinosaur from the Lower Cretaceous of China. *Nature* **484**, 92–95 (2012).
24. Alfaro, M. E. & Huelsenbeck, J. P. Comparative performance of Bayesian and AIC-based measures of phylogenetic model uncertainty. *Syst. Biol.* **55**, 89–96 (2006).
25. Boettiger, C., Coop, G. & Ralph, P. Is your phylogeny informative? Measuring the power of comparative methods. *Evolution* **66**, 2240–2251 (2012).
26. Beaulieu, J. M. & O'Meara, B. OUwie: analysis of evolutionary rates in an OU framework. *R Package Version 1*, (2012).
27. Carrano, M. T. & Sampson, S. D. The phylogeny of Ceratosauria (*Dinosauria: Theropoda*). *J. Syst. Palaeontol.* **6**, 183–236 (2008).
28. Carrano, M. T., Benson, R. B. & Sampson, S. D. The phylogeny of Tetanurae (*Dinosauria: Theropoda*). *J. Syst. Palaeontol.* **10**, 211–300 (2012).
29. Canale, J. I., Scanferla, C. A., Agnolin, F. L. & Novas, F. E. New carnivorous dinosaur from the Late Cretaceous of NW Patagonia and the evolution of abelisaurid theropods. *Naturwissenschaften* **96**, 409–414 (2009).
30. Smith, N. D., Makovicky, P. J., Hammer, W. R. & Currie, P. J. Osteology of *Cryolophosaurus ellioti* (*Dinosauria: Theropoda*) from the Early Jurassic of Antarctica and implications for early theropod evolution. *Zool. J. Linn. Soc.* **151**, 377–421 (2007).
31. Brusatte, S. L. & Benson, R. B. The systematics of Late Jurassic tyrannosauroid theropods from Europe and North America. *Acta Palaeontol. Pol.* **58**, 47–54 (2013).
32. Liyong, J., Jun, C. & Godefroit, P. A New Basal Ornithomimosaur (*Dinosauria: Theropoda*) from the Early Cretaceous Yixian Formation, Northeast China. *Bernissart Dinosaurs Early Cretac. Terr. Ecosyst.* 467 (2012).
33. Choiniere, J. N., Forster, C. A. & de Klerk, W. J. New information on *Nqwebasaurus thwazi*, a coelurosaurian theropod from the Early Cretaceous Kirkwood Formation in South Africa. *J. Afr. Earth Sci.* **71**, 1–17 (2012).

34. Godefroit, P. *et al.* Reduced plumage and flight ability of a new Jurassic paravian theropod from China. *Nat. Commun.* **4**, 1394 (2013).
35. Zheng, X., Xu, X., You, H., Zhao, Q. & Dong, Z. A short-armed dromaeosaurid from the Jehol Group of China with implications for early dromaeosaurid evolution. *Proc. R. Soc. B Biol. Sci.* **277**, 211–217 (2010).
36. Christiansen, P. & Fariña, R. A. Mass prediction in theropod dinosaurs. *Hist. Biol.* **16**, 85–92 (2004).
37. Bapst, D. W. paleotree: an R package for paleontological and phylogenetic analyses of evolution. *Methods Ecol. Evol.* **3**, 803–807 (2012).
